# Supplementary material for: Iron Status, Anemia, and Iron Interventions and Their Associations with Cognitive and Academic Performance in Adolescents: A Systematic Review
Source: MDPI journal article supplement (doi:10.3390/nu14010224), 2022-01-05
Supplement: s1 [file s1]

Supplementary data

## **ONLINE SUPPLEMENTARY MATERIAL**

### **Table of Contents**

Supplemental Table S1. Medline search strategy for 1946 to December 05, 2019

Supplemental Table S2. EMBASE search strategy for 1974 to December 05, 2019

Supplemental Table S3. CINAHL search strategy for 1982 to December 05, 2019

Supplemental Table S4. PRISMA checklist

**Table S1.** Medline search strategy for 1946 to December 05, 2019

| Search No. | Search                                                                                                                                                                                                                       | Results | Search Type |
|------------|------------------------------------------------------------------------------------------------------------------------------------------------------------------------------------------------------------------------------|---------|-------------|
| 1          | Adolescent/ or Child/                                                                                                                                                                                                        | 2740059 | Advanced    |
| 2          | (adolescen* or teen* or "young adult*" or "young people*" or "school child*" or "school-aged" or schoolchild* or "middle school*" or pubescen* or juvenile* or youth* or "high school*" or pre-pubesc* or prepubesc*).ti,ab. | 537210  | Advanced    |
| 3          | 1 or 2                                                                                                                                                                                                                       | 2941240 | Advanced    |
| 4          | exp cognition/ or executive function/ or exp learning/ or Social Behavior/ or Social Learning/ or exp thinking/ or attention/                                                                                                | 752960  | Advanced    |
| 5          | (cogniti* or "executive function*" or learn* or "social behavio?r" or think* or attention* or "social develop*").ti,ab.                                                                                                      | 1107348 | Advanced    |
| 6          | exp Educational Measurement/                                                                                                                                                                                                 | 144022  | Advanced    |
| 7          | ((education* or academic*) adj2 ("test score*" or success* or achiev* or measure* or perform*)).ti,ab.                                                                                                                       | 18090   | Advanced    |
| 8          | 4 or 5 or 6 or 7                                                                                                                                                                                                             | 1692449 | Advanced    |
| 9          | Anemia, Iron-Deficiency/ or Iron/ or Iron, Dietary/                                                                                                                                                                          | 99266   | Advanced    |
| 10         | (iron or an?emia).ti,ab.                                                                                                                                                                                                     | 292102  | Advanced    |
| 11         | 9 or 10                                                                                                                                                                                                                      | 317548  | Advanced    |
| 12         | 3 and 8 and 11                                                                                                                                                                                                               | 1561    | Advanced    |
| 13         | limit 12 to humans                                                                                                                                                                                                           | 1425    | Advanced    |

**Table S2.** EMBASE search strategy for 1974 to December 05, 2019

| Search No. | Search                                                                                                                                                                                                                       | Results | Search Type |
|------------|------------------------------------------------------------------------------------------------------------------------------------------------------------------------------------------------------------------------------|---------|-------------|
| 1          | Adolescent/ or Child/                                                                                                                                                                                                        | 2463816 | Advanced    |
| 2          | (adolescen* or teen* or "young adult*" or "young people*" or "school child*" or "school-aged" or schoolchild* or "middle school*" or pubescen* or juvenile* or youth* or "high school*" or pre-pubesc* or prepubesc*).ti,ab. | 683225  | Advanced    |
| 3          | 1 or 2                                                                                                                                                                                                                       | 2722629 | Advanced    |
| 4          | exp cognition/ or exp cognition assessment/ or exp learning/ or social behavior/ or social learning/ or exp attention/ or exp thinking/                                                                                      | 2220849 | Advanced    |
| 5          | cogniti* or "executive function*" or learn* or "social behavio?r" or think* or attention* or "social develop*").ti,ab.                                                                                                       | 1467827 | Advanced    |
| 6          | exp education/                                                                                                                                                                                                               | 1377183 | Advanced    |
| 7          | ((education* or academic*) adj2 ("test score*" or success* or achiev* or measure* or perform*)).ti,ab.                                                                                                                       | 22538   | Advanced    |
| 8          | 4 or 5 or 6 or 7                                                                                                                                                                                                             | 4008178 | Advanced    |
| 9          | iron deficiency/ or iron depletion/ or iron intake/ or iron deficiency anemia/ or iron therapy/ or iron blood level/ or iron/                                                                                                | 174691  | Advanced    |
| 10         | (iron or an?emia).ti,ab.                                                                                                                                                                                                     | 366708  | Advanced    |
| 11         | 9 or 10                                                                                                                                                                                                                      | 421826  | Advanced    |
| 12         | 3 and 8 and 11                                                                                                                                                                                                               | 6600    | Advanced    |
| 13         | limit 12 to humans                                                                                                                                                                                                           | 6169    | Advanced    |

**Table S3.** CINAHL search strategy for 1982 to December 05, 2019

| Search No. | Search                                                                                                                                                                                                                                                                                                                                                                                                                                                                                                                        | Results |
|------------|-------------------------------------------------------------------------------------------------------------------------------------------------------------------------------------------------------------------------------------------------------------------------------------------------------------------------------------------------------------------------------------------------------------------------------------------------------------------------------------------------------------------------------|---------|
| 1          | (MH "Adolescence+") OR (MH "Child+")                                                                                                                                                                                                                                                                                                                                                                                                                                                                                          | 875317  |
| 2          | TI adolescen* OR AB adolescen* OR TI teen* OR AB teen* OR TI "young adult*" OR AB "young adult*" OR TI "young people*" OR AB "young people*" OR TI "school child*" OR AB "school child" OR TI "school-aged" OR AB "school-aged" OR TI schoolchild* OR AB schoolchild* OR TI "middle school*" OR AB "middle school*" OR TI pubescen* OR AB pubescen* OR TI juvenile* OR AB juvenile* OR TI youth* OR AB youth* OR TI "high school*" OR AB "high school*" OR TI pre-pubesc* OR AB pre-pubesc* OR TI prepubesc* OR AB prepubesc* | 215128  |
| 3          | 1 or 2                                                                                                                                                                                                                                                                                                                                                                                                                                                                                                                        | 933635  |
| 4          | (MH "Cognition+") OR (MH "Executive Function") OR (MH "Learning+") OR (MH "Thinking+") OR (MH "Social Behavior") OR (MH "Attention")                                                                                                                                                                                                                                                                                                                                                                                          | 297331  |
| 5          | TI cogniti* OR AB cogniti* OR TI "executive function*" OR AB "executive function*" OR TI learn* OR AB learn* OR TI think* OR AB think* OR TI attention OR AB attention OR TI "social develop*" OR AB "social develop*" OR TI "social behavior#" OR AB "social behavior#"                                                                                                                                                                                                                                                      | 359458  |
| 6          | (MH "Outcomes of Education") OR (MH "Education+") OR (MH "Educational Measurement+") OR (MH "Student Performance Appraisal+")                                                                                                                                                                                                                                                                                                                                                                                                 | 834395  |
| 7          | ((education* or academic*) n2 ("test score*" or success* or achiev* or measure* or perform*)).ti,ab.                                                                                                                                                                                                                                                                                                                                                                                                                          | 0       |
| 8          | 4 or 5 or 6 or 7                                                                                                                                                                                                                                                                                                                                                                                                                                                                                                              | 1239762 |
| 9          | (MH "Iron") OR (MH "Anemia, Iron Deficiency")                                                                                                                                                                                                                                                                                                                                                                                                                                                                                 | 9592    |
| 10         | TI iron OR AB iron OR TI an#emia OR AB an#emia                                                                                                                                                                                                                                                                                                                                                                                                                                                                                | 29256   |
| 11         | 9 or 10                                                                                                                                                                                                                                                                                                                                                                                                                                                                                                                       | 31495   |
| 12         | 3 and 8 and 11                                                                                                                                                                                                                                                                                                                                                                                                                                                                                                                | 1141    |
| 13         | limit 12 to humans                                                                                                                                                                                                                                                                                                                                                                                                                                                                                                            | 754     |

**Table S4. PRISMA Checklist**

| Section/topic             | #  | Checklist item                                                                                                                                                                                                                                                                                              | Reported on page #       |
|---------------------------|----|-------------------------------------------------------------------------------------------------------------------------------------------------------------------------------------------------------------------------------------------------------------------------------------------------------------|--------------------------|
| <b>TITLE</b>              |    |                                                                                                                                                                                                                                                                                                             |                          |
| Title                     | 1  | Identify the report as a systematic review, meta-analysis, or both.                                                                                                                                                                                                                                         | 1                        |
| <b>ABSTRACT</b>           |    |                                                                                                                                                                                                                                                                                                             |                          |
| Structured summary        | 2  | Provide a structured summary including, as applicable: background; objectives; data sources; study eligibility criteria, participants, and interventions; study appraisal and synthesis methods; results; limitations; conclusions and implications of key findings; systematic review registration number. | 2                        |
| <b>INTRODUCTION</b>       |    |                                                                                                                                                                                                                                                                                                             |                          |
| Rationale                 | 3  | Describe the rationale for the review in the context of what is already known.                                                                                                                                                                                                                              | 3-4                      |
| Objectives                | 4  | Provide an explicit statement of questions being addressed with reference to participants, interventions, comparisons, outcomes, and study design (PICOS).                                                                                                                                                  | 4-5                      |
| <b>METHODS</b>            |    |                                                                                                                                                                                                                                                                                                             |                          |
| Protocol and registration | 5  | Indicate if a review protocol exists, if and where it can be accessed (e.g., Web address), and, if available, provide registration information including registration number.                                                                                                                               | 4                        |
| Eligibility criteria      | 6  | Specify study characteristics (e.g., PICOS, length of follow-up) and report characteristics (e.g., years considered, language, publication status) used as criteria for eligibility, giving rationale.                                                                                                      | 5                        |
| Information sources       | 7  | Describe all information sources (e.g., databases with dates of coverage, contact with study authors to identify additional studies) in the search and date last searched.                                                                                                                                  | 4<br>Supplementary file  |
| Search                    | 8  | Present full electronic search strategy for at least one database, including any limits used, such that it could be repeated.                                                                                                                                                                               | Supplementary tables 1-3 |
| Study selection           | 9  | State the process for selecting studies (i.e., screening, eligibility, included in systematic review, and, if applicable, included in the meta-analysis).                                                                                                                                                   | 5                        |
| Data collection process   | 10 | Describe method of data extraction from reports (e.g., piloted forms, independently, in duplicate) and                                                                                                                                                                                                      | 6                        |

## Supplementary data

|                                    |    |                                                                                                                                                                                                                        |                      |
|------------------------------------|----|------------------------------------------------------------------------------------------------------------------------------------------------------------------------------------------------------------------------|----------------------|
|                                    |    | any processes for obtaining and confirming data from investigators.                                                                                                                                                    |                      |
| Data items                         | 11 | List and define all variables for which data were sought (e.g., PICOS, funding sources) and any assumptions and simplifications made.                                                                                  | 6                    |
| Risk of bias in individual studies | 12 | Describe methods used for assessing risk of bias of individual studies (including specification of whether this was done at the study or outcome level), and how this information is to be used in any data synthesis. | 5-6                  |
| Summary measures                   | 13 | State the principal summary measures (e.g., risk ratio, difference in means).                                                                                                                                          | NA                   |
| Synthesis of results               | 14 | Describe the methods of handling data and combining results of studies, if done, including measures of consistency (e.g., $I^2$ ) for each meta-analysis.                                                              | NA                   |
| Risk of bias across studies        | 15 | Specify any assessment of risk of bias that may affect the cumulative evidence (e.g., publication bias, selective reporting within studies).                                                                           | NA                   |
| Additional analyses                | 16 | Describe methods of additional analyses (e.g., sensitivity or subgroup analyses, meta-regression), if done, indicating which were pre-specified.                                                                       | NA                   |
| <b>RESULTS</b>                     |    |                                                                                                                                                                                                                        |                      |
| Study selection                    | 17 | Give numbers of studies screened, assessed for eligibility, and included in the review, with reasons for exclusions at each stage, ideally with a flow diagram.                                                        | 6<br>Fig. 1          |
| Study characteristics              | 18 | For each study, present characteristics for which data were extracted (e.g., study size, PICOS, follow-up period) and provide the citations.                                                                           | 7-8<br>Tables 1 & 2  |
| Risk of bias within studies        | 19 | Present data on risk of bias of each study and, if available, any outcome level assessment (see item 12).                                                                                                              | 8-9                  |
| Results of individual studies      | 20 | For all outcomes considered (benefits or harms), present, for each study: (a) simple summary data for each intervention group (b) effect estimates and confidence intervals, ideally with a forest plot.               | 9-22<br>Tables 1 & 2 |
| Synthesis of results               | 21 | Present results of each meta-analysis done, including confidence intervals and measures of consistency.                                                                                                                | NA                   |
| Risk of bias across studies        | 22 | Present results of any assessment of risk of bias across studies (see Item 15).                                                                                                                                        | NA                   |

## Supplementary data

|                     |    |                                                                                                                                                                                      |       |
|---------------------|----|--------------------------------------------------------------------------------------------------------------------------------------------------------------------------------------|-------|
| Additional analysis | 23 | Give results of additional analyses, if done (e.g., sensitivity or subgroup analyses, meta-regression [see Item 16]).                                                                | NA    |
| <b>DISCUSSION</b>   |    |                                                                                                                                                                                      |       |
| Summary of evidence | 24 | Summarize the main findings including the strength of evidence for each main outcome; consider their relevance to key groups (e.g., healthcare providers, users, and policy makers). | 22-26 |
| Limitations         | 25 | Discuss limitations at study and outcome level (e.g., risk of bias), and at review-level (e.g., incomplete retrieval of identified research, reporting bias).                        | 26-27 |
| Conclusions         | 26 | Provide a general interpretation of the results in the context of other evidence, and implications for future research.                                                              | 27-29 |
| <b>FUNDING</b>      |    |                                                                                                                                                                                      |       |
| Funding             | 27 | Describe sources of funding for the systematic review and other support (e.g., supply of data); role of funders for the systematic review.                                           | 1     |
